# Supplementary material for: A facile preparation method of surface patterned polymer electrolyte membranes for fuel cell applications
Source: Royal Society of Chemistry journal article supplement (doi:10.1039/c4ta00674g), 2014-01-01
Supplement: c4ta00674g1.pdf [file c4ta00674g1.pdf]

## Supporting Information

# Facile Preparation Method of Surface Patterned Polymer Electrolyte Membranes for Fuel Cell Applications

Jong Kwan Koh<sup>‡</sup>, Yukwon Jeon<sup>‡</sup>, Yong il Cho, Jong Hak Kim<sup>\*</sup>, Yong Gun Shul<sup>\*</sup>

Department of Chemical and Biomolecular Engineering, Yonsei University, 50 Yonsei-ro,  
Seodaemun-gu, Seoul 120-749, Korea

*<sup>‡</sup> These authors contributed equally to this work.*

*<sup>\*</sup> Corresponding Author: E-mail: [jonghak@yonsei.ac.kr](mailto:jonghak@yonsei.ac.kr) (Prof. J.H. Kim), [shulyg@yonsei.ac.kr](mailto:shulyg@yonsei.ac.kr) (Prof. Y.G. Shul),*

**Figure S1.** SEM surface images of Nafion membranes with different pattern shapes fabricated using various patterned PDMS molds. (a) Square pattern, (b) hexagonal pattern, (c) circle pattern, and (d) rounded rectangle pattern.

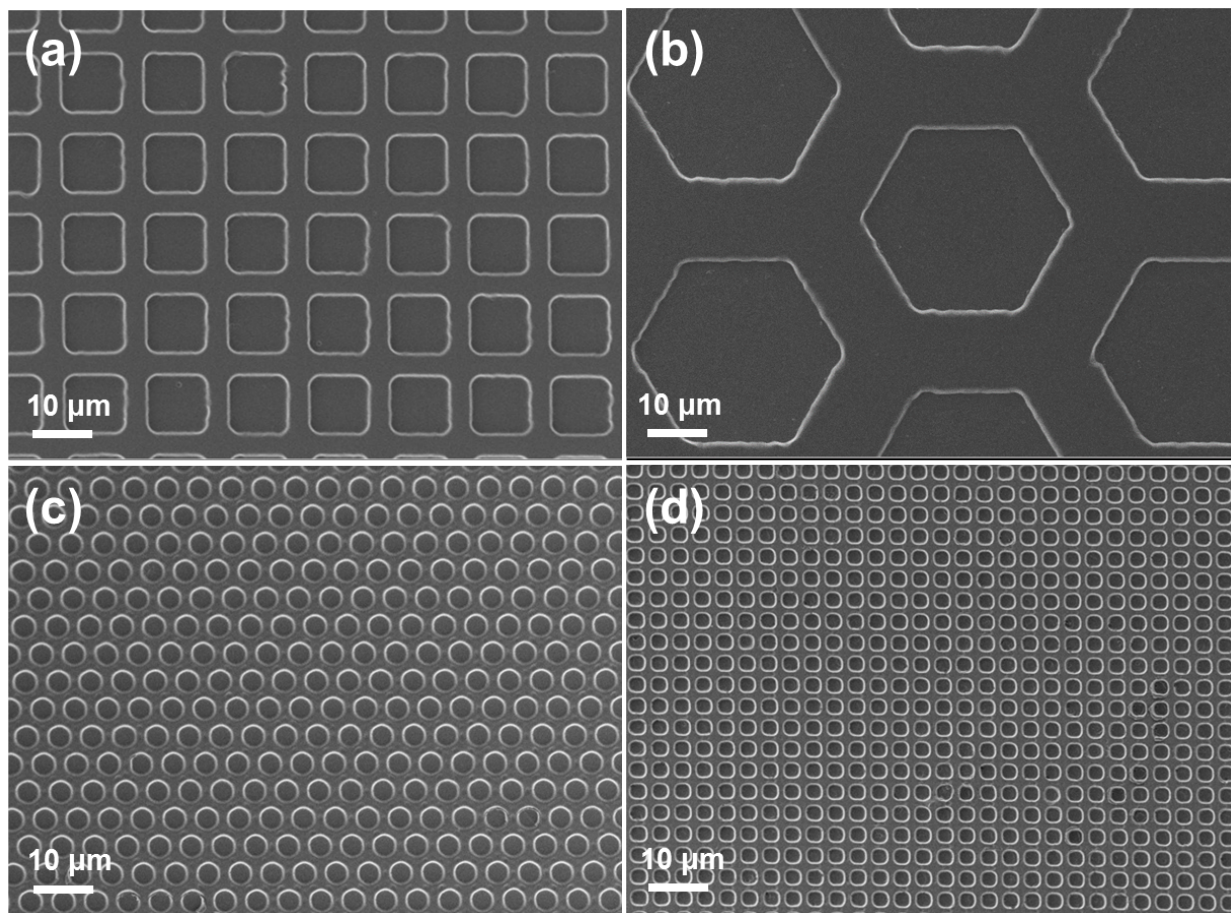

**Figure S2.** XRD patterns of the catalyst layers sprayed on the Nafion membranes before performance testing.

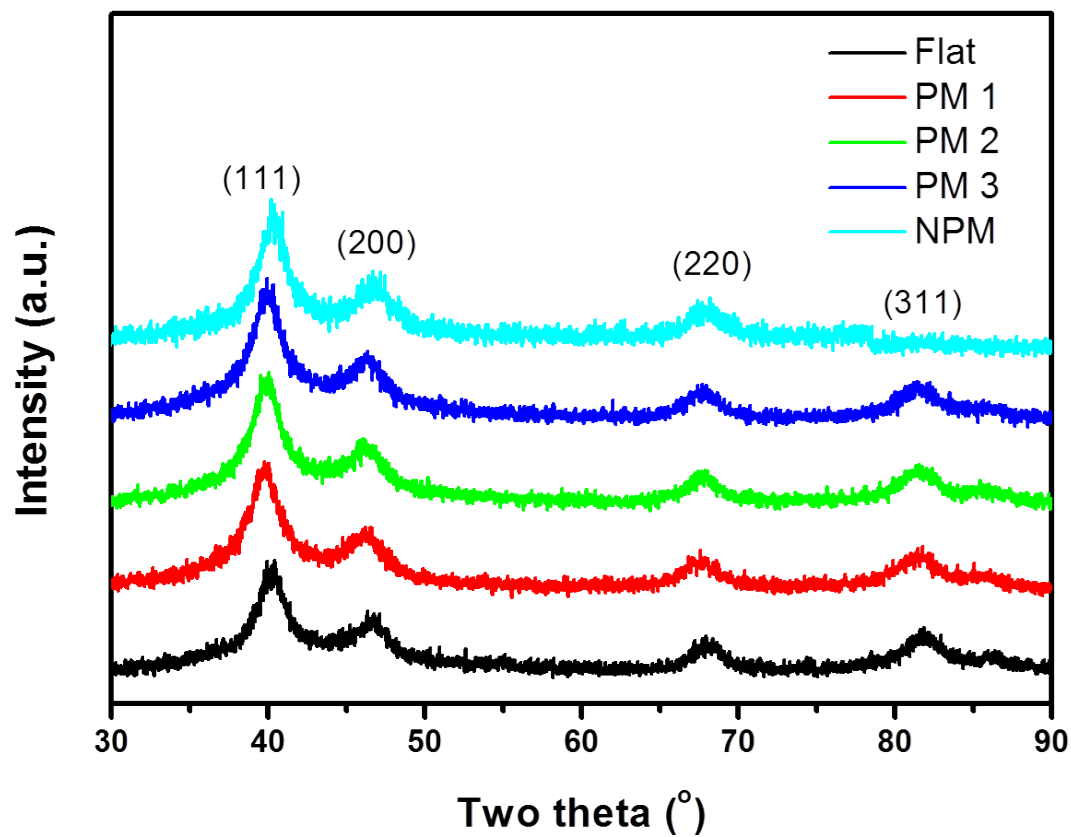

**Figure S3.** (a) polarization (I-V) curves and power density curves, (b) CV curves and (c) Nyquist plots of single PEM fuel cell MEAs fabricated with the commercial Nafion 212 membrane at 75 °C 100 % RH.

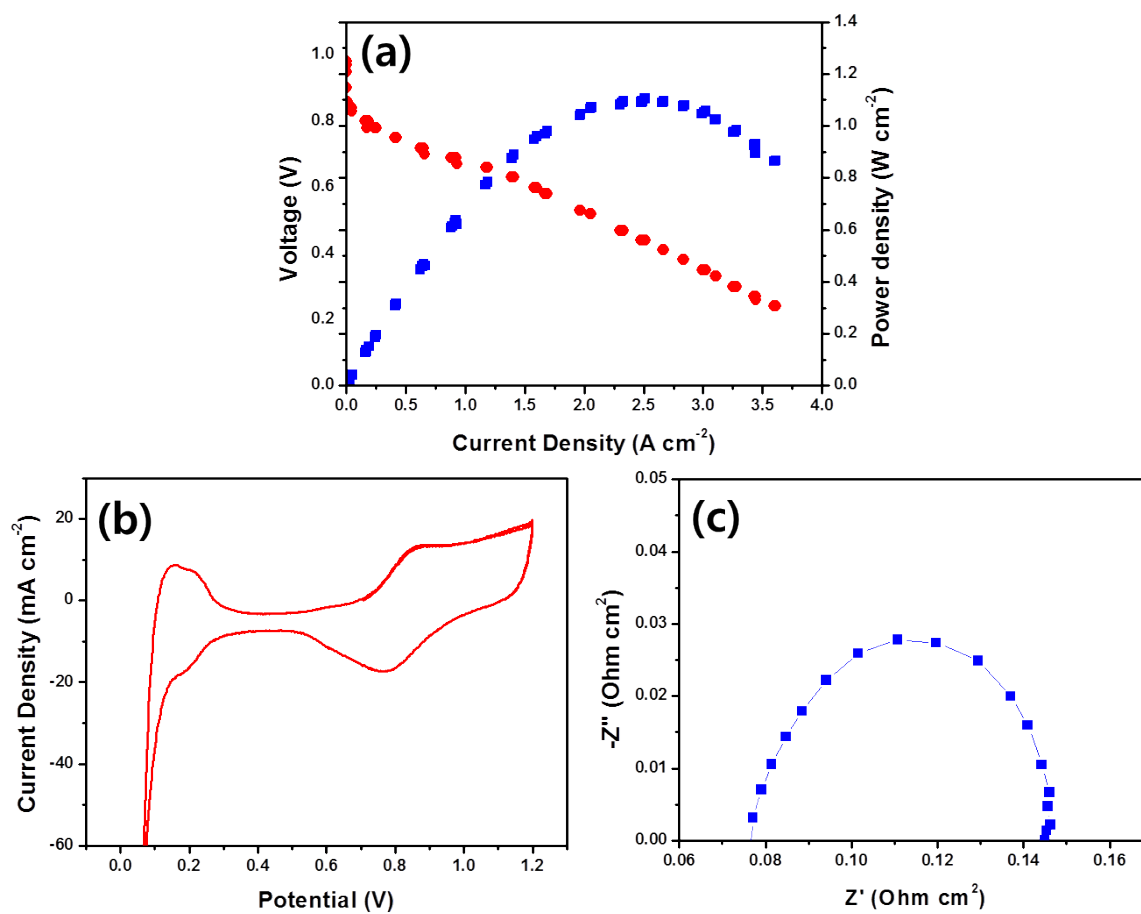

**Table S1.** Membrane properties and performance of of single PEM fuel cell MEAs fabricated with commercial Nafion 212 membrane at 75 °C 100 % RH.

|                                                      | Commercial Nafion 212 |
|------------------------------------------------------|-----------------------|
| Pattern size ( $\mu\text{m}$ ) (width/space/height)  | -                     |
| Specific membrane surface area                       | 1                     |
| Thickness ( $\mu\text{m}$ )                          | 50                    |
| ECSA ( $\text{m}^2/\text{g}$ )                       | 42.3                  |
| Current density at 0.6 V ( $\text{A}/\text{cm}^2$ )  | 1.58                  |
| Maximum power density ( $\text{W}/\text{cm}^2$ )     | 0.79                  |
| Ohmic resistance ( $\Omega \text{ cm}^2$ )           | 0.08                  |
| Charge transfer resistance ( $\Omega \text{ cm}^2$ ) | 0.07                  |
